# Supplementary material
Source: PubMed Central journal article supplement (PMC4325767)
Supplement: AAC.04263-14_zac003153783so1.pdf [file AAC.04263-14_zac003153783so1.pdf]

Table S1 Influenza virus isolation from children treated with peramivir during the 2012–2013 and 2013–2014 influenza seasons

| Days after treatment | Total<br>(n = 20)  | Type A                             |                 | Type B<br>(n=7) |
|----------------------|--------------------|------------------------------------|-----------------|-----------------|
|                      |                    | H1N1 pdm09<br>(n = 5) <sup>a</sup> | H3N2<br>(n = 8) |                 |
| Day 0                | 15/20 <sup>b</sup> | 2/5                                | 6/8             | 7/7             |
| Day 1                | 15/20              | 3/5                                | 6/8             | 6/7             |
| Day 2                | 13/19              | 1/5                                | 6/8             | 6/6             |
| Day 3                | 2/3                | none <sup>c</sup>                  | 1/2             | 1/1             |
| Day 4                | 1/2                | none <sup>c</sup>                  | 1/1             | 0/1             |
| Day 5                | 4/9                | 1/4                                | 0/2             | 3/3             |
| Total                | 50/73              | 7/19                               | 20/29           | 23/25           |

<sup>a</sup>One patient treated with peramivir at 85.5 h after the onset of illness was excluded from virus isolation.

<sup>b</sup>Number of positive samples/total number of samples.

<sup>c</sup>No clinical samples were collected.

Figure S1

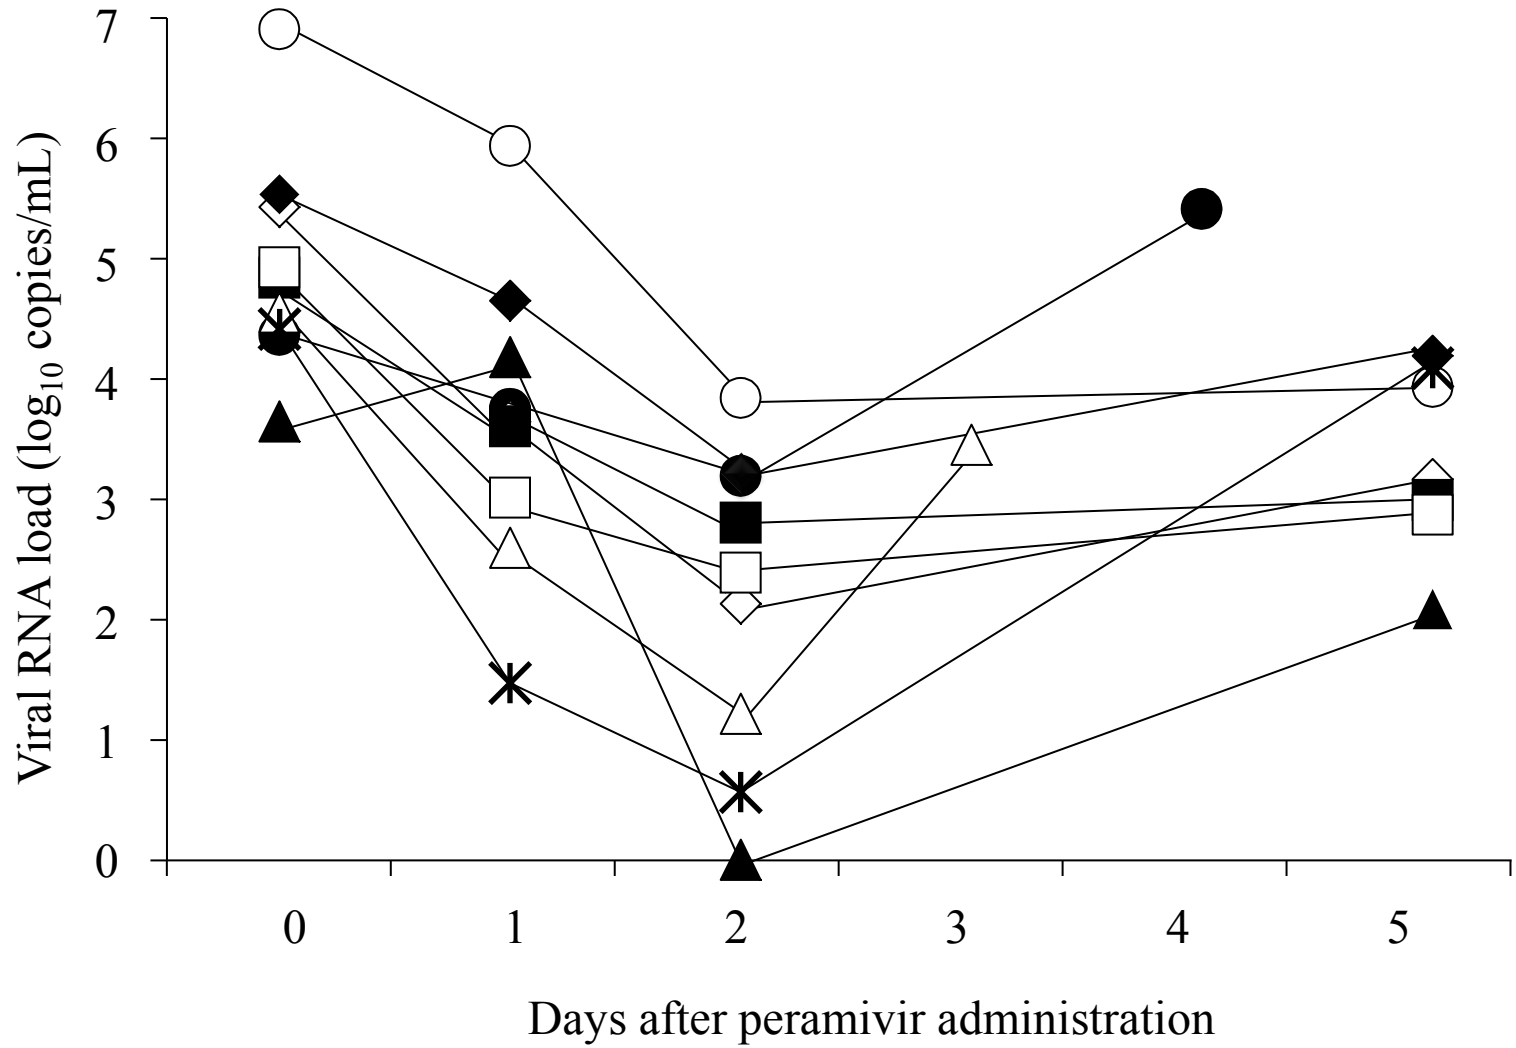

Sequential viral RNA load (log<sub>10</sub> copies/mL) among 9 patients, 3 in H1N1 pdm09 and 6 in H3N2, whose viral load increased 3 days after a single peramivir administration.

Figure S2

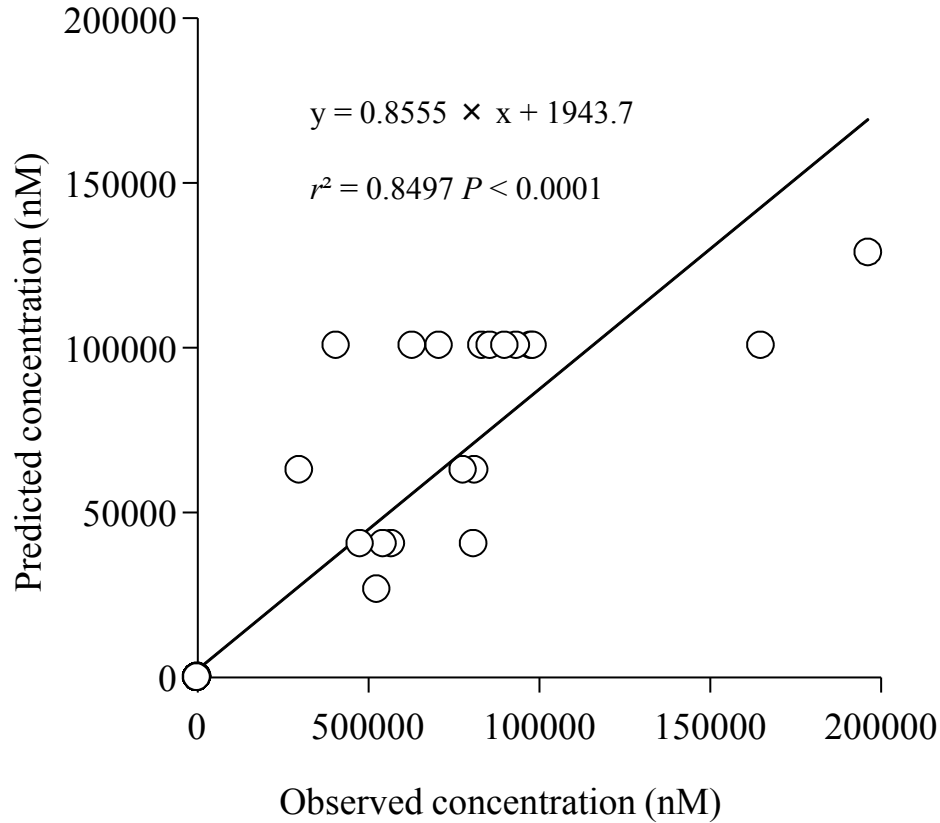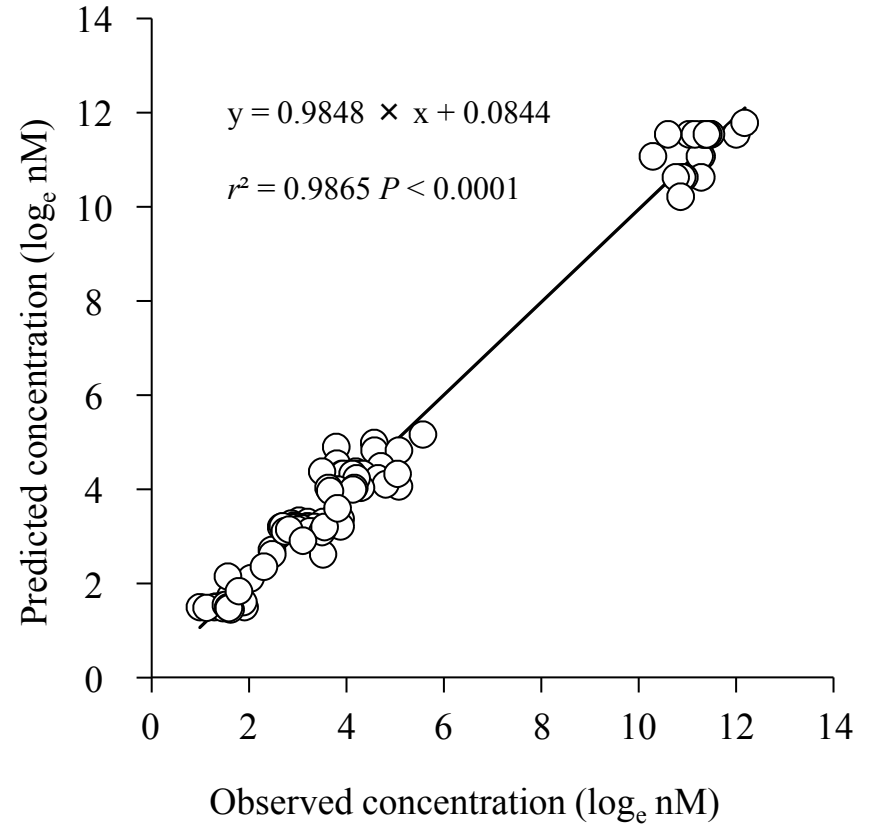

The fitness of blood peramivir concentration predicted using the predictive blood concentration-time curve to measured values.

Left; normal scale, Right; natural logarithmic scale.
